# Supplementary material
Source: ML conference proceedings conference paper supplement (https://proceedings.neurips.cc/paper_files/paper/2020/hash/86b94dae7c6517ec1ac767fd2c136580-Abstract.html)
Supplement: Supplementary file 1 [file 86b94dae7c6517ec1ac767fd2c136580-Supplemental.zip]

Archive with 2 entries (2 files):
- Ada-BF_code_and_datasets.zip
- Ada_BF__NeurIPS_2020_Appendix.pdf
