# Supplementary material
Source: ML conference proceedings conference paper supplement (https://proceedings.neurips.cc/paper_files/paper/2020/hash/86b94dae7c6517ec1ac767fd2c136580-Abstract.html)
Supplement: Supplementary file 1 [file 86b94dae7c6517ec1ac767fd2c136580-Supplemental.zip › Ada_BF__NeurIPS_2020_Appendix.pdf]

## A More comparisons between the LBF and sandwiched LBF

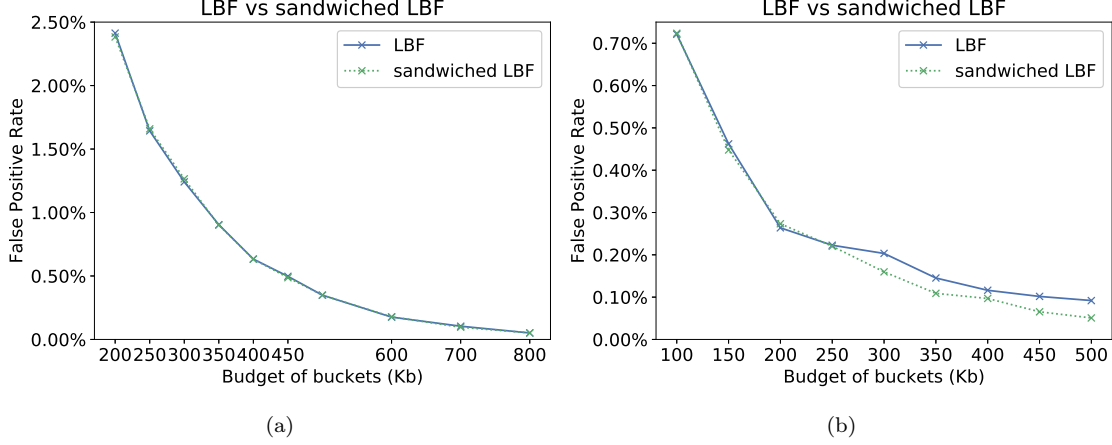

Figure A.1: FPR comparison between LBF and sandwiched LBF under different bitmap sizes. (a) malicious URL experiment; (b) malware detection experiment

## B Comparing the Bloom filter to Hierarchical Hashing

The machine learning model used in the learned Bloom filters is critical because it has discrimination power between the keys and non-keys and is more efficient in identifying keys in some cases. To show its unique role, we replaced the machine learning model with another Bloom filter such that it becomes a hierarchical Bloom filter (learner is replaced by an initial filter). To implement the hierarchical Bloom filter, we spare 50% of the bit budget to the initial filter and use the other bits to build the backup filter.

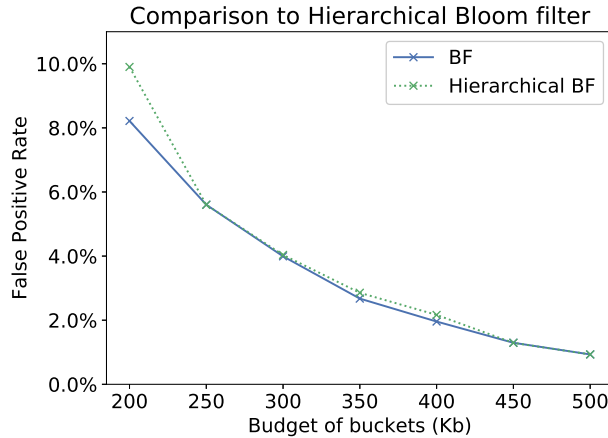

Figure B.1: FPR comparison between LBF and sandwiched LBF under different bitmap sizes. (a) malicious URL experiment; (b) malware detection experiment

Figure B.1 shows that the hierarchical BF does not outperform the original BF under all the budget of

buckets, and in some cases, it even achieves a worse FPR. Hence, using a random hash function to replace the learner is not a memory efficient approach.

## C Proof of the Statements

### Proof of Lemma 1:

*Proof.* Let  $Z_j(x) = \sum_{i=1}^m \mathbb{1}(s(x) \in [\tau_{j-1}, \tau_j) | x \notin S)$ , then  $Z_j(x) \sim \text{Bernoulli}(p_j)$ , and  $m_j = \sum_{i=1}^m Z_j(x_i)$  counts the number of non-keys falling in group  $j$  and  $\hat{p}_j = \frac{m_j}{m}$ . To upper bound the probability of the overall estimation error of  $p_j$ , first, we need to evaluate its expectation,  $\mathbb{E} \left( \sum_{j=1}^K |\hat{p}_j - p_j| \right)$ .

Since  $m_j$  is a binomial random variable, its exact cdf is hard to compute. But with central limit theorem, when  $m$  is large,  $\frac{m_j - mp_j}{\sqrt{mp_j(1-p_j)}} \rightarrow N(0, 1)$ . Thus, we can approximate  $\mathbb{E}(|\hat{p}_j - p_j|) = \mathbb{E} \left( \left| \frac{m_j - mp_j}{\sqrt{mp_j(1-p_j)}} \right| \right) \cdot \sqrt{\frac{p_j(1-p_j)}{m}} \approx \sqrt{\frac{2}{\pi}} \cdot \sqrt{\frac{p_j(1-p_j)}{m}}$  (if  $Z \sim N(0, 1)$ ,  $\mathbb{E}(|Z|) = \sqrt{\frac{2}{\pi}}$ ). Then, the expectation of overall error is approximated by  $\mathbb{E} \left( \sum_{j=1}^K |\hat{p}_j - p_j| \right) \approx \sqrt{\frac{2}{m\pi}} \cdot \left( \sum_{j=1}^K \sqrt{p_j(1-p_j)} \right)$ , which goes to 0 as  $m$  becomes larger.

We need to further upper bound the tail probability of  $\sum_{j=1}^K |\hat{p}_j - p_j|$ . First, we upper bound the variance of  $\sum_{j=1}^K |\hat{p}_j - p_j|$ ,

$$\begin{aligned} \text{Var} \left( \sum_{j=1}^K |\hat{p}_j - p_j| \right) &\leq K \sum_{j=1}^K \text{Var}(|\hat{p}_j - p_j|) \\ &= K \sum_{j=1}^K \left( \text{Var}(\hat{p}_j - p_j) - \mathbb{E}(|\hat{p}_j - p_j|)^2 \right) \\ &\approx \frac{K}{m} \sum_{j=1}^K \left( p_j(1-p_j) - \frac{2}{\pi} \left( \sum_{i=1}^K \sqrt{p_i(1-p_i)} \right)^2 \right) \triangleq \frac{K}{m} V(\mathbf{p}) \end{aligned}$$

Now, by invoking the Chebyshev's inequality,

$$\begin{aligned} &\mathbb{P} \left[ \sum_{j=1}^K |\hat{p}_j - p_j| \geq \epsilon \right] \\ &= \mathbb{P} \left[ \sum_{j=1}^K |\hat{p}_j - p_j| - \mathbb{E} \left( \sum_{j=1}^K |\hat{p}_j - p_j| \right) \geq \epsilon - \mathbb{E} \left( \sum_{j=1}^K |\hat{p}_j - p_j| \right) \right] \\ &\leq \frac{\text{Var} \left( \sum_{j=1}^K |\hat{p}_j - p_j| \right)}{\left( \epsilon - \mathbb{E} \left( \sum_{j=1}^K |\hat{p}_j - p_j| \right) \right)^2} \\ &= \frac{KV(\mathbf{p})}{m \left( \epsilon - \mathbb{E} \left( \sum_{j=1}^K |\hat{p}_j - p_j| \right) \right)^2} \rightarrow 0 \text{ as } m \rightarrow \infty \end{aligned}$$

Thus,  $\sum_{j=1}^K |\hat{p}_j - p_j|$  converges to 0 in probability as  $m \rightarrow \infty$ .  $\square$

Moreover, since we have

$$\begin{aligned} \mathbb{E} \left( \sum_{j=1}^K |\hat{p}_j - p_j| \right) &\approx \sqrt{\frac{2}{m\pi}} \left( \sum_{j=1}^K \sqrt{p_j(1-p_j)} \right) \\ &\leq \sqrt{\frac{2}{m\pi}} (K-1) \end{aligned} \quad (1)$$

$$\begin{aligned} V(\mathbf{p}) &= \sum_{j=1}^K \left( p_j(1-p_j) - \frac{2}{\pi} \left( \sum_{i=1}^K \sqrt{p_i(1-p_i)} \right)^2 \right) \\ &\leq \sum_{j=1}^K \left( p_j(1-p_j) \left( 1 - \frac{2}{\pi} \right) \right) \\ &\leq \left( 1 - \frac{2}{\pi} \right) \left( 1 - \frac{1}{K} \right) \end{aligned} \quad (2)$$

Then, by Eq 1 and Eq 2, we can upper bound  $\mathbb{P} \left[ \sum_{j=1}^K |\hat{p}_j - p_j| \geq \epsilon \right]$  by,

$$\begin{aligned} \mathbb{P} \left[ \sum_{j=1}^K |\hat{p}_j - p_j| \geq \epsilon \right] &\leq \frac{KV(\mathbf{p})}{m \left( \epsilon - \mathbb{E} \left( \sum_{j=1}^K |\hat{p}_j - p_j| \right) \right)^2} \\ &\leq \frac{(1 - \frac{2}{\pi})(K-1)}{m \left( \epsilon - \sqrt{\frac{2}{m\pi}}(K-1) \right)^2} \end{aligned} \quad (3)$$

When  $m \geq \frac{2(K-1)}{\epsilon^2} \left[ \sqrt{\frac{1}{\pi}} + \sqrt{\frac{1-2/\pi}{\delta}} \right]^2$ , we have  $m \left( \epsilon - \sqrt{\frac{2}{m\pi}}(K-1) \right)^2 \geq \frac{(K-1)(1-2/\pi)}{\delta}$ , thus,  $\mathbb{P} \left[ \sum_{j=1}^K |\hat{p}_j - p_j| \geq \epsilon \right] \leq \delta$ .  $\square$

### Proof of Theorem 1:

*Proof.* For comparison, we choose  $\tau = \tau_{g-1}$ , for both LBF and Ada-BF, queries with scores larger than  $\tau$  are identified as keys directly by the same machine learning model. Thus, to compare the overall FPR, we only need to evaluate the FPR of queries with score lower than  $\tau$ .

Let  $p_0 = \mathbb{P}[s(x) < \tau | x \notin S]$  be the probability of a key with score lower than  $\tau$ . Let  $n_0$  denote the number of keys with score less than  $\tau$ ,  $n_0 = \sum_{i: x_i \in S} I(s(x_i) < \tau)$ . For learned Bloom filter using  $K$  hash functions, the

expected FPR follows,

$$\begin{aligned}\mathbb{E}(\text{FPR}) &= (1 - p_0) + p_0 \left( 1 - \left( 1 - \frac{1}{R} \right)^{Kn_0} \right)^K \\ &= 1 - p_0 + p_0 \beta^K,\end{aligned}\tag{4}$$

where  $R$  is the length of the Bloom filter. For Ada-BF, assume we fix the number of groups  $g$ . Then, we only need to determine  $K_{max}$  and  $K_{min} = K_{max} - g + 1$ . Let  $p_j = Pr(\tau_{j-1} \leq s(x) < \tau_j | x \notin S)$ . The expected FPR of the Ada-BF is,

$$\begin{aligned}\mathbb{E}(\text{FPR}_a) &= \sum_{j=1}^g p_j \left( 1 - \left( 1 - \frac{1}{R} \right)^{\sum_{j=1}^{g-1} K_j n_j} \right)^K_j \\ &= \sum_{j=1}^{g-1} p_j \alpha^{K_j},\end{aligned}\tag{5}$$

where  $\sum_{j=1}^{g-1} n_j = n_0$ . Next, we give a strategy to select  $K_{max}$  which ensures a lower FPR of Ada-BF than LBF.

Select  $K_{max} = \lfloor K + \frac{g}{2} - 1 \rfloor$ . Let  $T_i = n_i - n_{i-1}$ . Then, we have

$$\begin{aligned}n_0 K &= \sum_{j=1}^{g-1} n_j K &= K \left[ n_1 + \sum_{i=2}^{g-1} (n_1 + \sum_{i=1}^{j-1} T_i) \right] \\ &= K \left[ n_1(g-1) + \sum_{j=1}^{g-2} T_j(g-j-1) \right] \\ &= K n_1(g-1) + \frac{2K}{g-2} \left[ \sum_{j=1}^{g-2} \frac{(g-2)(g-1-j)}{2} T_j \right] \\ &\leq \frac{2K}{g-2} \left[ \frac{(g-1)(g-2)}{2} n_1 + \sum_{j=1}^{g-2} \frac{(g+j-2)(g-1-j)}{2} T_j \right] \\ &\stackrel{(1)}{\leq} \frac{2K}{g-2} \sum_{j=1}^{g-1} (j-1) n_j,\end{aligned}\tag{6}$$

where inequality (1) comes from  $\sum_{j=1}^{g-2} \frac{(g-2)(g-1-j)}{2} T_j \leq \sum_{j=1}^{g-2} \frac{(g+j-2)(g-1-j)}{2} T_j$ . By Eq 6. we further get the relationship between  $\alpha$  and  $\beta$ .

$$\begin{aligned}\sum_{j=1}^{g-1} K_j n_j &= \sum_{j=1}^{g-1} (K_{max} - j + 1) n_j \\ &\leq n_0 \left( K_{max} - \frac{g}{2} + 1 \right) \leq n_0 K \\ \implies \alpha &\leq \beta.\end{aligned}$$

Moreover, since in the main text, we have seen,

$$\begin{aligned}\mathbb{E}(\text{FPR}) &= \sum_{j=1}^g p_j \alpha^{K_j} = \frac{\sum_{j=1}^g c^{g-j} \alpha^{K_j}}{\sum_{j=1}^g c^{g-j}} \\ &\leq \begin{cases} \frac{(1-c)(1-(c\alpha)^g)}{(\frac{1}{\alpha}-c)(\alpha^g-(c\alpha)^g)} \alpha^{K_{max}}, & c\alpha \neq 1 \\ \frac{1-c}{1-c^g} \cdot g, & c\alpha = 1 \end{cases}\end{aligned}$$

Thus,

$$\begin{aligned}\mathbb{E}(\text{FPR}_a) &= \frac{(1-c)(1-(c\alpha)^g)}{(\frac{1}{\alpha}-c)(\alpha^g-(c\alpha)^g)} \alpha^{K_{max}} \\ &\leq \frac{(1-c)(1-(c\alpha)^g)}{(\frac{1}{\alpha}-c)(\alpha^g-(c\alpha)^g)} \beta^{K_{max}} \\ &\leq \beta^{K_{max}} \frac{\alpha(c-1)}{c\alpha-1} \\ &< \mathbb{E}(\text{FPR}) \left( \frac{1+\lambda}{\lambda} \beta^{K_{max}-K} \right) \\ &\leq \mathbb{E}(\text{FPR}) \left( \frac{1+\lambda}{\lambda} \beta^{\lfloor g/2-1 \rfloor} \right).\end{aligned}$$

Therefore, as  $g$  increases, the upper bound of  $\mathbb{E}(\text{FPR}_a)$  decreases exponentially fast. Moreover, since  $\frac{1+\lambda}{\lambda}$  is a constant, when  $g$  is large enough, we have  $\frac{1+\lambda}{\lambda} \beta^{\lfloor g/2-1 \rfloor} \leq 1$ . Thus, the  $\mathbb{E}(\text{FPR}_e)$  is reduced to strictly lower than  $\mathbb{E}(\text{FPR})$ .  $\square$

## Proof of Theorem 2:

*Proof.* Let  $\eta = \frac{\log(c)}{\log(\mu)} \approx \frac{\log(c)}{\log(0.618)} < 0$ . By the tuning strategy described in the previous section, we require the expected false positive items should be similar across the groups. Thus, we have

$$\begin{aligned}p_1 \cdot \mu^{R_1/n_1} &= p_j \cdot \mu^{R_j/n_j} \\ \implies R_j &= n_j \left( \frac{R_1}{n_1} + (j-1)\eta \right), \text{ for } j \in [g-1]\end{aligned}$$

where  $R_j$  is the budget of buckets for group  $j$ . For group  $j$ , since all the queries are identified as keys by the machine learning model directly, thus,  $R_g = 0$ . Given length of Bloom filter for group 1,  $R_1$ , the total budget of buckets can be expressed as,

$$\sum_{j=1}^{g-1} R_j = \sum_{j=1}^{g-1} \frac{n_j}{n_1} R_1 + (j-1)n_j\eta$$

Let  $p_0 = \Pr(s(x) < \tau | x \notin S)$  and  $p_j = \Pr(\tau_{j-1} \leq s(x) < \tau_j | x \notin S)$ . Let  $n_0$  denote the number of keys with score less than  $\tau$ ,  $n_0 = \sum_{i: x_i \in S} I(s(x_i) < \tau)$ , and  $n_j$  be the number of keys in group  $j$ ,  $n_j = \sum_{i: x_i \in S} I(\tau_{j-1} \leq s(x_i) < \tau_j)$ . Due to  $\tau = \tau_{g-1}$ , we have  $\sum_{j=1}^{g-1} n_j = n_0$ . Moreover, since  $\tau_{g-1} = \tau$ , queries with score higher than  $\tau$  have the same FPR for both disjoint Ada-BF and LBF. So, we only need to compare the FPR of the two methods when the score is lower than  $\tau$ . If LBF and Ada-BF achieve the same optimal expected FPR, we have

$$\begin{aligned} p_0 \cdot \mu^{R/n_0} &= \sum_{j=1}^{g-1} p_j \cdot \mu^{R_j/n_j} = g \cdot p_1 \cdot \mu^{R_1/n_1} \\ \implies R &= \frac{n_0}{n_1} R_1 - n_0 \frac{\log(p_0/p_1) - \log(g)}{\log(\mu)} \\ &= \sum_{j=1}^{g-1} \left[ \frac{n_j}{n_1} R_1 - n_j \frac{\log(1 - (\frac{1}{c}))^g - \log(1 - \frac{1}{c}) - \log(g)}{\log(\mu)} \right], \end{aligned}$$

where  $R$  is the budget of buckets of LBF. Let  $T_j = n_{j+1} - n_j \geq 0$ . Next, we upper bound  $\sum_{j=1}^{g-1} n_j$  with  $\sum_{j=1}^{g-1} (j-1)n_j$ .

$$\begin{aligned} \sum_{j=1}^{g-1} n_j &= n_1 + \sum_{i=2}^{g-1} (n_1 + \sum_{i=1}^{j-1} T_i) \\ &= n_1(g-1) + \sum_{j=1}^{g-2} T_j(g-j-1) \\ &= \frac{2}{g-2} \left[ \frac{(g-1)(g-2)n_1}{2} + \sum_{j=1}^{g-2} \frac{(g-2)(g-1-j)T_j}{2} \right] \\ &\leq \frac{2}{g-2} \left[ \frac{(g-1)(g-2)n_1}{2} + \sum_{j=1}^{g-2} \frac{(g+j-2)(g-1-j)T_j}{2} \right] \\ &= \frac{2}{g-2} \sum_{j=1}^{g-1} (j-1)n_j \end{aligned}$$

Therefore, we can lower bound  $R$ ,

$$R \geq \sum_{j=1}^{g-1} \left[ \frac{n_j}{n_1} R_1 - (j-1)n_j \frac{2(\log(1 - (\frac{1}{c}))^g - \log(1 - \frac{1}{c}) - \log(g))}{(g-2)\log(\mu)} \right].$$

Now, we can lower bound  $R - \sum_{j=1}^{g-1} R_j$ ,

$$R - \sum_{j=1}^{g-1} R_j \geq \sum_{j=1}^{g-1} (j-1)n_j \left[ -\eta - \frac{2(\log(1 - (\frac{1}{c}))^g - \log(1 - \frac{1}{c}) - \log(g))}{(g-2)\log(\mu)} \right].$$

Since  $\eta$  is a negative constant, while  $\frac{2(\log(1 - (\frac{1}{c}))^g - \log(1 - \frac{1}{c}) - \log(g))}{(g-2)\log(\mu)}$  approaches to 0 when  $g$  is large. Therefore, when  $g$  is large,  $\eta - \frac{2(\log(1 - (\frac{1}{c}))^g - \log(1 - \frac{1}{c}) - \log(g))}{(g-2)\log(\mu)} < 0$  and  $R - \sum_{j=1}^{g-1} R_j$  is strictly larger than 0. So, disjoint Ada-BF consumes less memory than LBF to achieve the same expected FPR.  $\square$
